1 **Probable omnigenic effect and evolutionary insights of aerobic adaptation allele**  
2 **OsNCED2<sup>T</sup> on qDTY12.1 effecting grain yield under reproductive stage drought stress in**  
3 **rice**

4 Parameswaran C\*<sup>1</sup>, Cayalvizhi B<sup>1</sup>, Sanghamitra S<sup>1</sup>, Anandan N<sup>1</sup>, Jawahar Lal K<sup>1</sup>, Devanna BN<sup>1</sup>,  
5 Awadhesh K<sup>1</sup>, Kishor J<sup>1</sup>, Bandita S<sup>1</sup>, Niranjana B<sup>1</sup>, Biswaranjan B<sup>1</sup>

6 **Short Title**

7 Omnigenic effect of qDTY12.1 and its evolution in rice varieties

8 1- Crop Improvement Division, ICAR-National Rice Research Institute (ICAR-NRRI),  
9 Cuttack, Odisha 753006, India

10 \*Communicating author

11 Parameswaran C, PhD  
12 Scientist,  
13 Crop Improvement Division,  
14 National Rice Research Institute (ICAR-NRRI),  
15 Cuttack, Odisha, 753006  
16 India  
17 E-mail: [agriparames07@gmail.com](mailto:agriparames07@gmail.com)  
18 Phone: 9650083543  
19

20 **Author's contribution**

21 PC and AN conceptualized the idea, JLK, BB, KJ retrieved the sequence information from  
22 different databases, PC, DBN, AK, NB performed the analysis, BS, PC, CB, SS wrote the  
23 manuscript, and SS coordinated the entire study

24

25 **Competing interests**

26 Authors declare no competing interests

27 **Abstract**

28 Yield associated quantitative trait loci (qDTY) under drought stress provides significant  
29 advantage for grain yield in rice. The major, stable qDTY12.1 was identified in a mapping  
30 population developed from upland cultivars Vandana and Way Rarem. Further, introgression line  
31 comprising of qDTY12.1 genomic region was characterized to have multiple genes (NAM,  
32 DECUSSATE) regulating the drought tolerance under severe drought stress substantiated  
33 through recently proposed omnigenic model for complex traits. Recently, plastid localized  
34 NCED2<sup>T</sup> allele present within the qDTY12.1 genomic region was characterized for conferring  
35 aerobic adaptation in lowland varieties. Since, NCED2<sup>T</sup> is evolutionary fixed in upland cultivars  
36 and Vandana was found to have the favorable allele of NCED2<sup>T</sup>, we hypothesized that this  
37 favorable allele might confer omnigenic effect on qDTY12.1 genes. Our evolutionary analysis  
38 using non synonymous SNPs present in genes namely NCED, NAM, and DECUSSATE and  
39 qDTY12.1 genomic regions showed specific grouping of Vandana with upland cultivars only for  
40 NCED gene and its adjoining genomic regions. However, non synonymous SNPs in NAM and  
41 DECUSSATE genes and its adjoining genomic regions of drought tolerant varieties were closely  
42 related and grouped together in the phylogenetic analysis. Moreover, ecotype specific  
43 differentiation and greater nucleotide difference with wild relatives was also observed for  
44 DECUSSATE gene in rice. This finding indicates differential evolution of qDTY12.1 regions for  
45 upland and drought tolerance and omnigenic effect of NCED2<sup>T</sup> gene in qDTY12.1. Further, we  
46 propose a breeding model for enhancing genetic gain for yield under severe drought stress by  
47 incorporation of NCED<sup>T</sup>, qDTY12.1 and other drought tolerant QTLs for membrane stability in  
48 rice.

49

50

51

52

53

54

## 55 Introduction

56 Abscisic acid (ABA) is a major plant hormone which plays a significant role in drought  
57 tolerance in plants (Zhang et al, 2006). Plants adaptation to water limitation conditions are tightly  
58 regulated through abscisic acid biosynthesis (Xiong and Zhu, 2003). The plastid localized NCED  
59 genes (9-*cis*-epoxy-carotenoid dioxygenase) are involved in biosynthesis of precursors required  
60 for the synthesis of ABA in plants (Vallabhaneni et al, 2010). In rice, favorable allele of  
61 NCED2<sup>T</sup> was specifically fixed in upland cultivars and reported to increase the cellular ABA  
62 levels and lateral roots (Lyu et al, 2013). Recently, NCED2<sup>T</sup> allele was functionally  
63 characterized for the aerobic adaptation in upland cultivars (Hu et al, 2020). This gene is located  
64 in the chromosome number 12 of rice at 14, 232,905 to 14,234,854 Mbp.

65 Genetic studies on drought tolerance for yield in rice resulted in the identification of  
66 several yield QTLs (qDTY) which relatively maintains yield under drought stress conditions  
67 (Kumar et al, 2014). A stable, major, large effect QTL for drought tolerance namely qDTY12.1  
68 enhanced drought tolerance of lowland cultivars (Mishra et al, 2013). This QTL was identified  
69 and fine mapped using Vandana and Way Rarem mapping population and located within the  
70 RM28048 (14,106,460) and RM28166 (17,607,668) markers located in chromosome 12.  
71 Besides, peak marker (RM512) was found to be present at 17,395,485 bp in chromosome 12 of  
72 this QTL (Dixit et al, 2012). Further characterization of qDTY12.1 showed multiple genes within  
73 the QTL region might be regulating the drought tolerance response for yield in rice (Dixit et al,  
74 2015). Specifically, two genes namely *OsNAM*<sub>12.1</sub>: 17,391,342 to 17,392,627 (Dixit et al, 2015)  
75 and *OsDEC*: 16,500,219 to 16,504,887 were characterized through multiple approaches as casual  
76 genes providing ‘omnigenic effect’ for drought tolerance in the qDTY12.1 (de los Reyes et al,  
77 2021).

78 Furthermore, introgression line used in the fine mapping and characterization of  
79 qDTY12.1 spanned between RM28048 and RM28166 of qDTY12.1. In addition, both the  
80 parents namely Vandana and Way Rarem were upland cultivars. Besides, our preliminary  
81 observation using SNP seek database also showed presence of OsNCED2<sup>T</sup> allele in Vandana  
82 cultivar. Therefore, we hypothesized that both the parents might have OsNCED2<sup>T</sup> allele and this  
83 favorable allele responsible for efficient ABA synthesis might provide ‘omnigenic effect’ to the  
84 causal genes present in qDTY12.1.

## 85 Methodology

86 SNP seek database of rice was used to retrieve the non synonymous single nucleotide  
87 polymorphisms in the selected genes and within qDTY12.1 (Alexandrov et al, 2015).  
88 Phyogeny.fr online tool was used for construction of phylogenetic analysis using default  
89 parameters (Dereeper et al, 2008). TASUKE tool was used for retrieval of gene sequence from  
90 wild relatives of rice (Kumagai et al, 2013). MEGAX software was used for the multiple  
91 alignment and neighbor-joining phylogenetic analysis of retrieved sequences (Kuamr et al,  
92 2018). Flapjack tool was used for the graphical representation of the non synonymous SNPs in  
93 the genes (Milne et al, 2010)

## 94 Results

95 The presence of OsNCED2<sup>T</sup> allele (LOC\_Os12g24800) in 3k rice panel was initially  
96 analyzed in SNP seek database of rice. The allelic position (14233796) corresponding to the  
97 functional alternate alleles (C/T) in the NCED2 gene showed approximately 9% (268 nos) of rice  
98 genotypes in 3k panel is having the favorable OsNCED2<sup>T</sup> allele. Besides, heterozygous alleles  
99 were found in 75 rice genotypes. Further, *indica 3*, *indx*, and *sub tropical japonica* has more  
100 number of genotypes containing favorable allele as compared to other ecotypes (Fig.1). Apart  
101 from the functional allele, all non-synonymous SNPs identified against Nipponbare reference of  
102 the three selected genes (NCED, NAM, DEC) were also analyzed. These three genes were  
103 previously characterized for drought tolerance and present within qDTY12.1. Non synonymous  
104 SNPs for the three genes were retrieved from seven selected genotypes namely N22 (drought  
105 tolerant landrace), Vandana (upland variety), IRAT 104 (upland variety), Swarna, Bala, and  
106 FL478 from SNP seek database. The analysis identified 14, 3, and 22 SNPs in NCED, NAM,  
107 DEC genes, respectively. Further, phylogenetic reconstruction of selected genotypes was  
108 performed using the non-synonymous SNPs identified in the three genes (Fig. 2).

109 The phylogeny for NCED gene showed seven genotypes were separated into two clusters  
110 and Nipponbare was present as outgroup. The first cluster consists of drought tolerant and upland  
111 varieties namely N22, Vandana, and IRAT 10. The remaining susceptible genotypes were  
112 present in cluster II of the phylogeny. Similarly, phylogeny of NAM gene divided seven  
113 genotypes into two clusters. The upland or drought tolerant cultivar namely N22, IRAT 104 were  
114 present in one group along with Swarna and Nipponbare. However, Vandana, Bala, and FL478

115 were present in cluster II. Also, N22 and IRAT 104 were present in same cluster for DEC gene in  
116 the phylogeny. Thus, initial phylogenetic analysis for the functional genes clearly showed  
117 drought tolerant/upland cultivar, N22 and IRAT 104 were always grouped in same cluster for  
118 three genes. In contrast, Vandana was grouped along with N22 and IRAT 104 only for NCED  
119 gene and were grouped together with susceptible cultivars for remaining two genes.

120 We hypothesized that differential evolution of genomic regions within the qDTY12.1  
121 might be the reason for the grouping of upland genotype Vandana with other genotypes namely  
122 N22 and IRAT 104. Hence, phylogenetic reconstruction was again performed using all the non  
123 synonymous SNPs spanning the qDTY12.1 for the seven genotypes. The qDTY12.1 (14-18  
124 Mbp) in chromosome 12 were divided into four different genomic blocks (14-15 Mbp, 15-16  
125 Mbp, 16-17 Mbp, 17-18 Mbp) and analyzed for the grouping of selected genotypes. The analysis  
126 showed there were 681, 322, 306, and 180 non synonymous SNPs within the four genomic  
127 blocks, respectively. Further, Vandana, N22, and IRAT 104 were grouped together only in 14-15  
128 Mbp genomic region of qDTY12.1. But, Vandana was grouped along with the susceptible  
129 genotypes and N22 and IRAT 104 were present in same cluster for the 15-16 Mbp genomic  
130 region of qDTY12.1. These findings showed not only the selected genes but there was also  
131 differential evolution of genomic regions within qDTY12.1. Accordingly, we have predicted the  
132 genomic regions for the genotypes N22, Vandana, IRAT 104, and Way Rarem (Fig. 3f). The  
133 entire qDTY12.1 was divided into two genomic segments or blocks. The first segment comprises  
134 of favorable allele of NCED2<sup>T</sup> present only in upland genotypes namely Vandana, IRAT 104,  
135 and Way Rarem. The second block comprises of genomic regions specifically in N22, IRAT 104  
136 and Way Rarem. Further, first and second genomic block in qDTY12.1 provides early drought  
137 response and yield maintenance under drought, respectively. Thus, we assume that NCED2<sup>T</sup>  
138 allele might have an omnigenic effect on the genomic blocks of qDTY12.1.

139 The presence of the favorable allele in OsNCED2<sup>T</sup> was also analyzed in wild relatives of  
140 rice. The analysis showed only one accession of *Oryza rufipogon* (W1807) has the favorable  
141 allele for NCED2 gene (Fig. 4). Then, non synonymous substitutions in the DECUSSATE gene  
142 were also analyzed in all rice genotypes of the 3k panel and wild relatives. The haplotype blocks  
143 was constructed in different rice ecotypes for the DECUSSATE gene and analyzed for the  
144 specific fixation of non reference alleles (Fig. 5). The analysis showed sub tropical and temperate  
145 japonica retained the reference alleles of Nipponbare. However, all other ecotypes including

146 tropical japonica showed non synonymous substitutions in the gene of varying proportions.  
147 Additionally, many wild relatives also showed non synonymous substitutions in the coding  
148 regions of the gene (Fig. 6). Thus, DECUSSATE gene and the genomic regions of the qDTY12.1  
149 might have evolutionary significance in rice.

150 **Fig. 1.** Distribution of favorable allele (OsNCED2<sup>T</sup>) in different rice accessions in SNP seek  
151 database

152

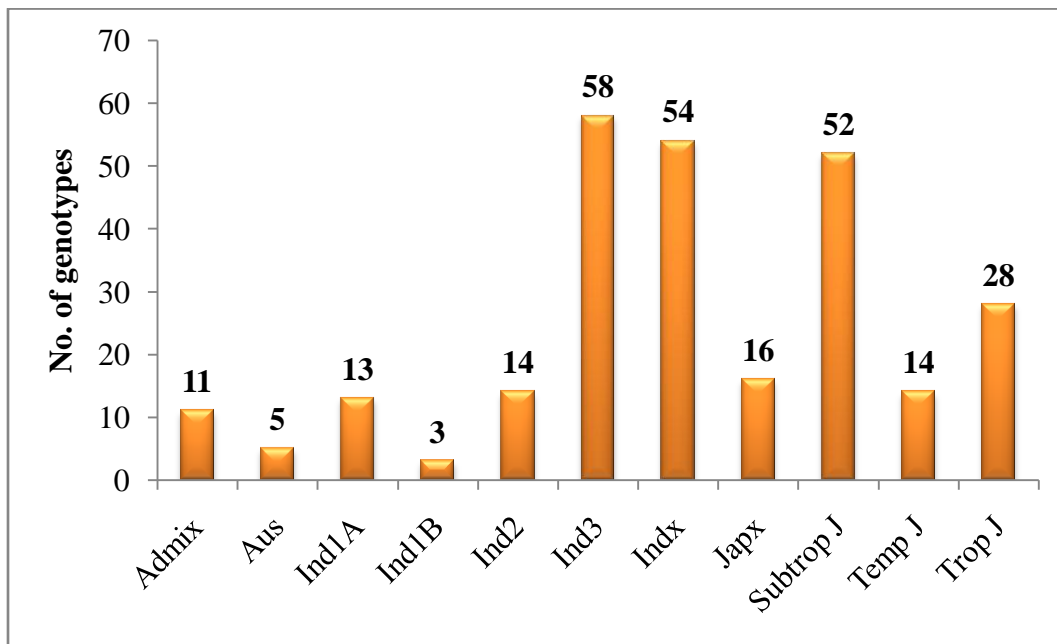

153

154

155

156

157

158

159

160

161 **Fig. 2.** Phylogenetic analysis of seven genotypes using SNPs present in three selected genes

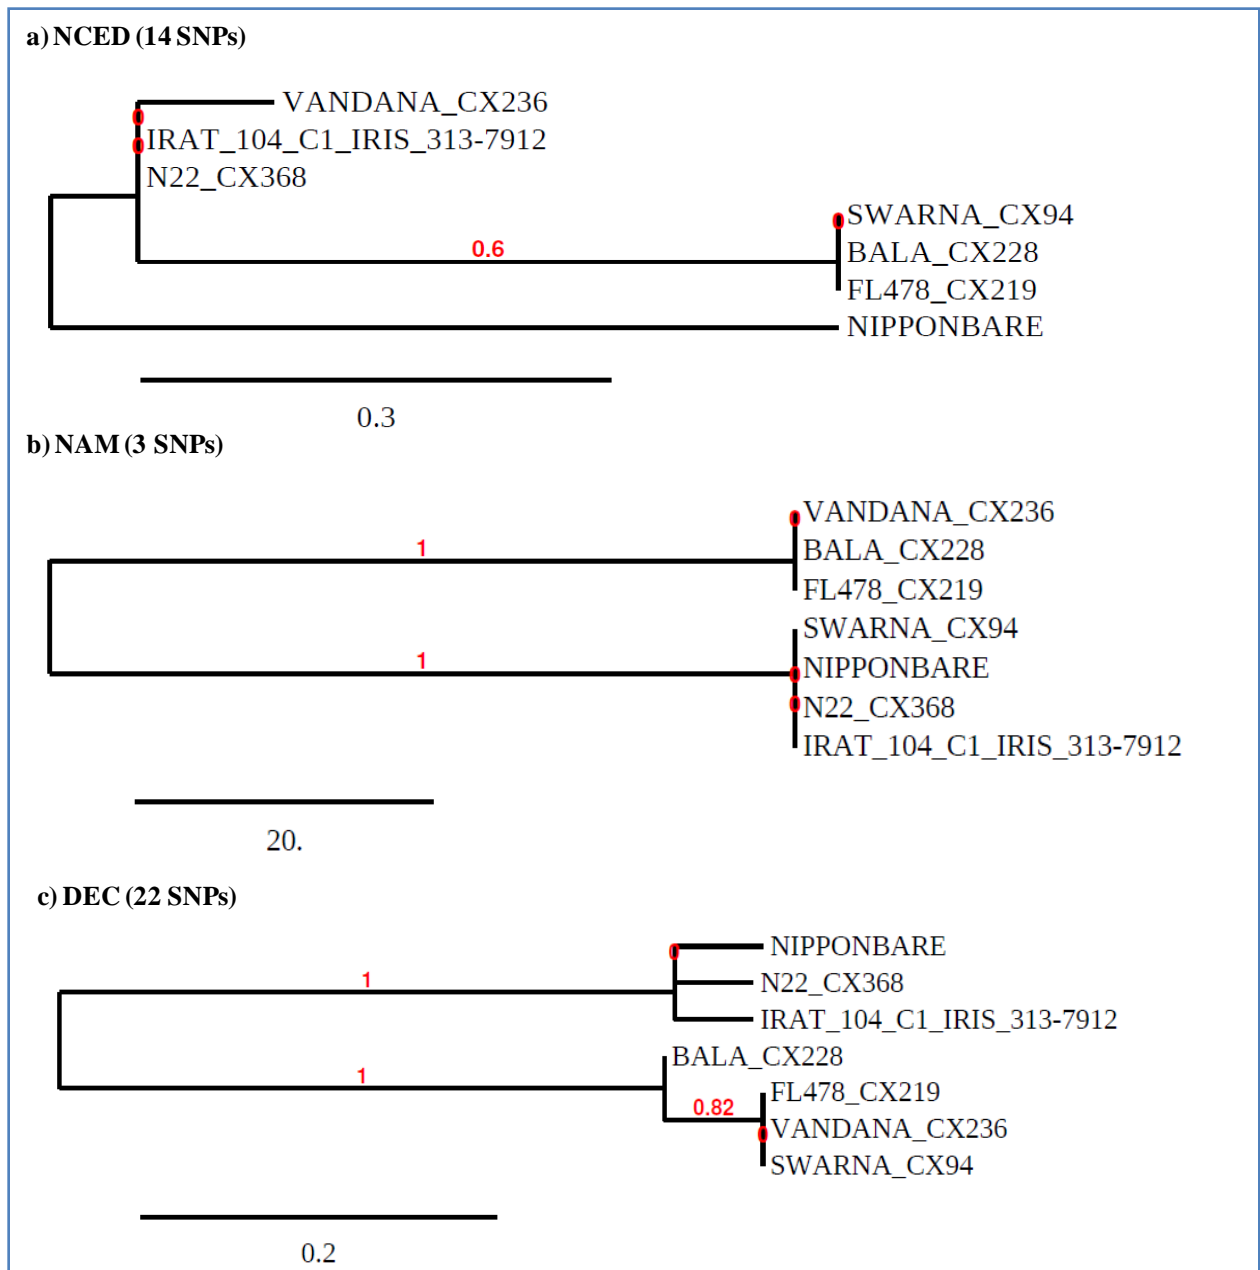

162

163 **Fig. 2** Phylogenetic analysis of seven genotypes using SNPs present in three selected genes. a-  
164 neighbor-joining phylogeny using non synonymous SNPs in NCED gene, b- neighbor-joining  
165 phylogeny using non synonymous SNPs in NAM gene, c- neighbor-joining phylogeny using non  
166 synonymous SNPs in DECUSSATE gene. Numbers in bracket indicates total non synonymous  
167 SNPs identified in the three selected genes.

168

169 **Fig. 3.** Phylogenetic analysis of seven genotypes using SNPs identified in qDTY12.1

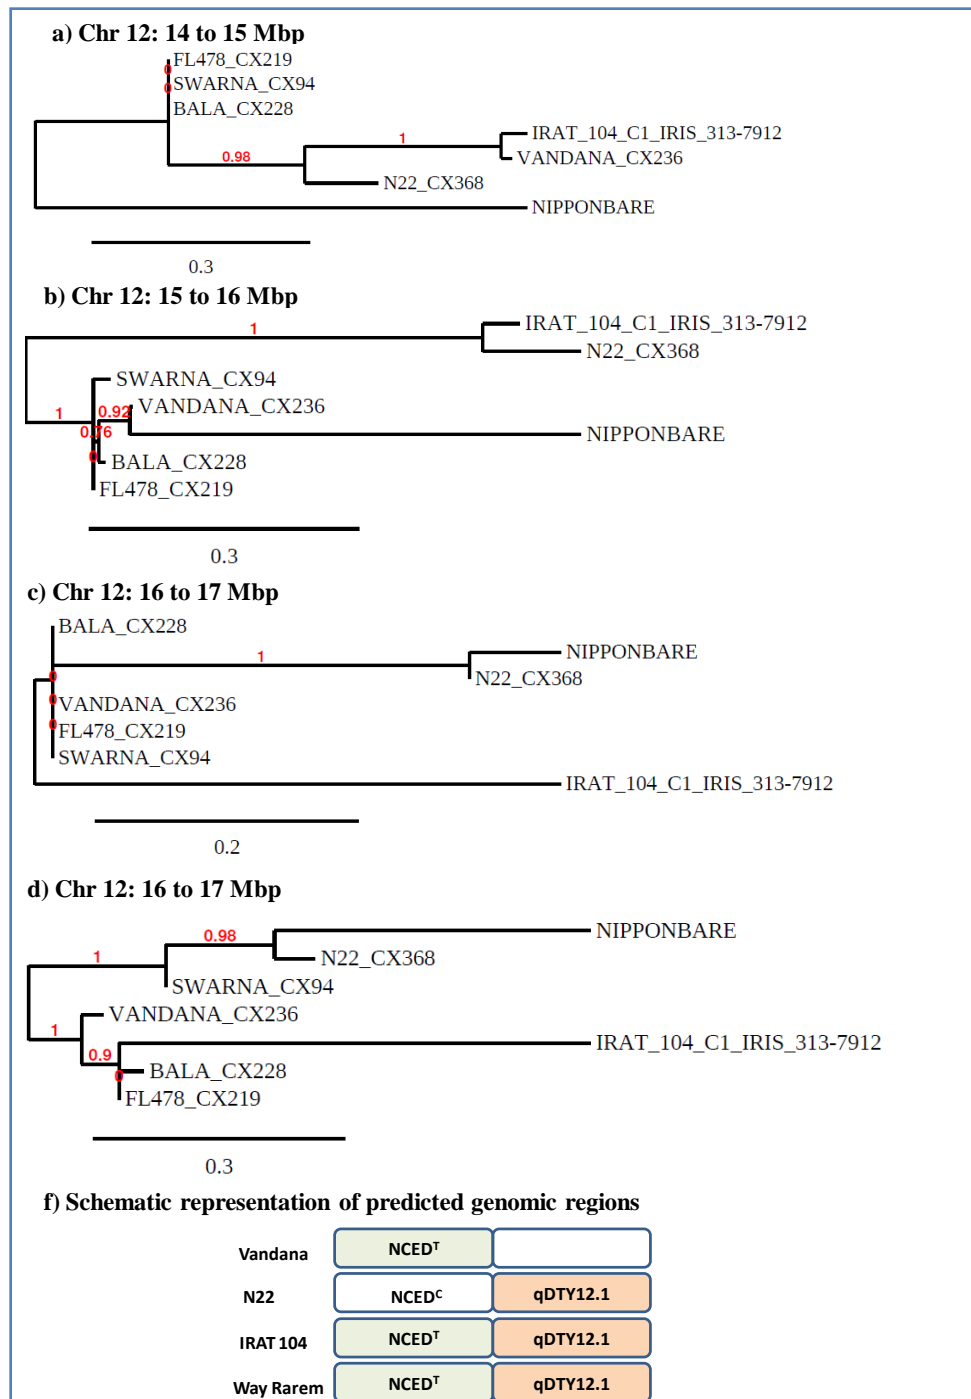

170

171 **Fig. 3.** Phylogenetic analysis of seven genotypes using SNPs identified in qDTY12.1. a,b,c,d  
 172 represents neighbor-joining phylogenetic tree for different genomic regions. f- represents two  
 173 genomic blocks in qDTY12.1 and predicted genotypes for four cultivars. Green color fill  
 174 indicates presence of favorable allele for NCED gene, brown color fill indicates favorable alleles  
 175 for qDTY 12.1



176 **Fig. 4.** Multiple alignments of NCED gene in rice wild relatives.

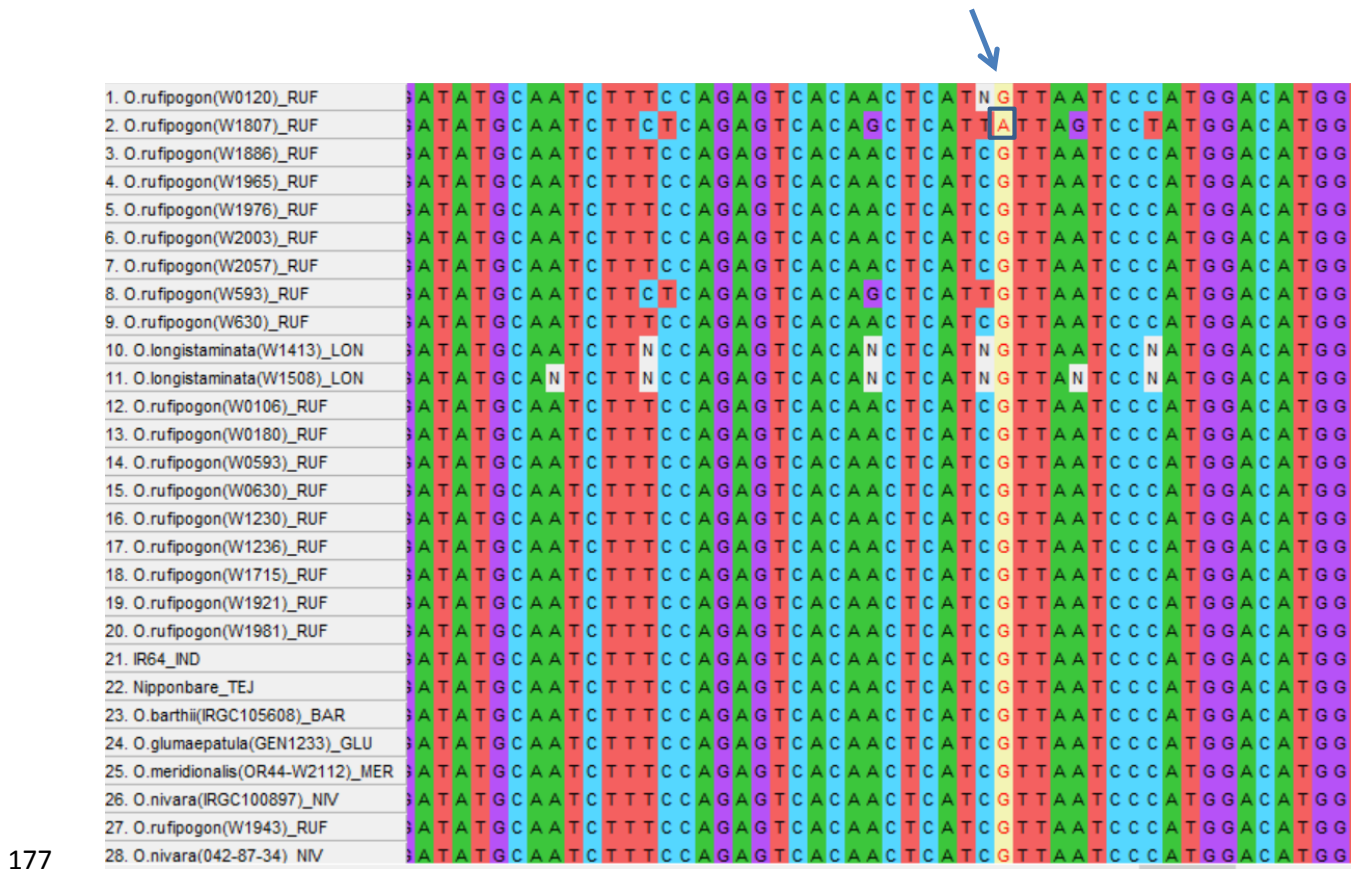

178 **Fig. 4.** Multiple alignment of NCED gene in rice wild relatives. Arrow indicates the alignment  
179 position and boxed nucleotide indicate the favorable allele in one of the wild relatives (*Oryza*  
180 *rufipogon*).

181

182

183

184

185

186

187

188 **Fig. 5.** Graphical representation of haplotypes of DECUSSATE gene in different ecotypes of rice

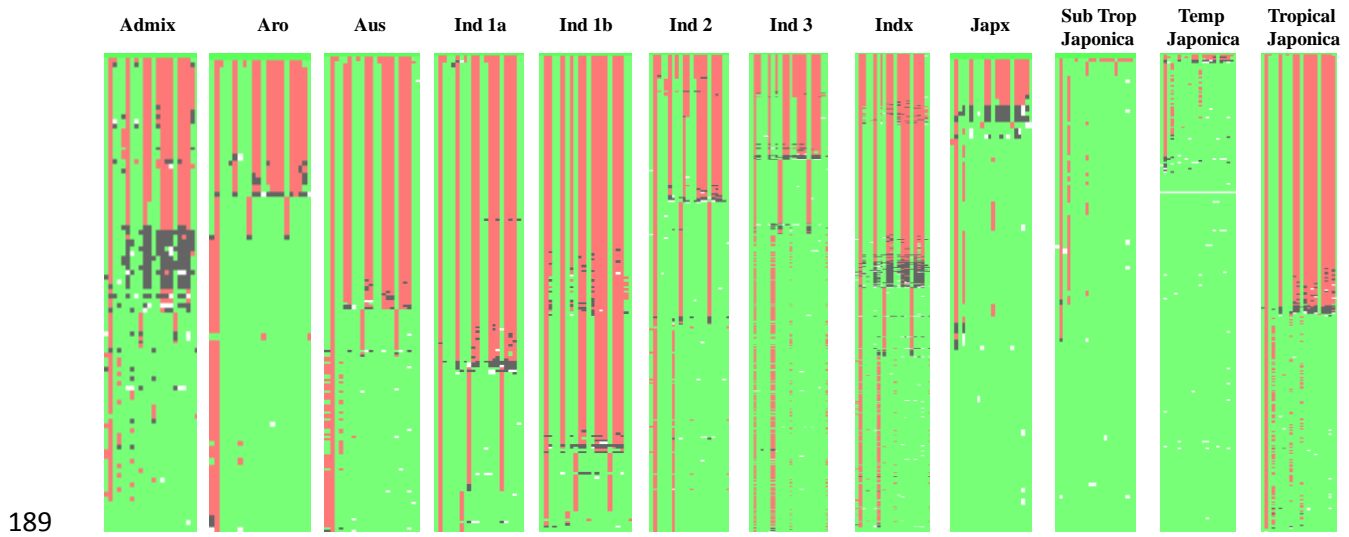

190 **Fig. 5.** Graphical representation of haplotypes of DECUSSATE gene in different ecotypes of rice  
191 Green, red and black represents similar, alternate and heterozygous allele to Nipponbare  
192 reference gene sequence. Non availability of sequence information was indicated in white color  
193 boxes.

194

195

196

197

198

199

200

201

202

203

204 **Fig. 6.** Phylogenetic analysis of DECUSSATE gene in wild relatives of rice

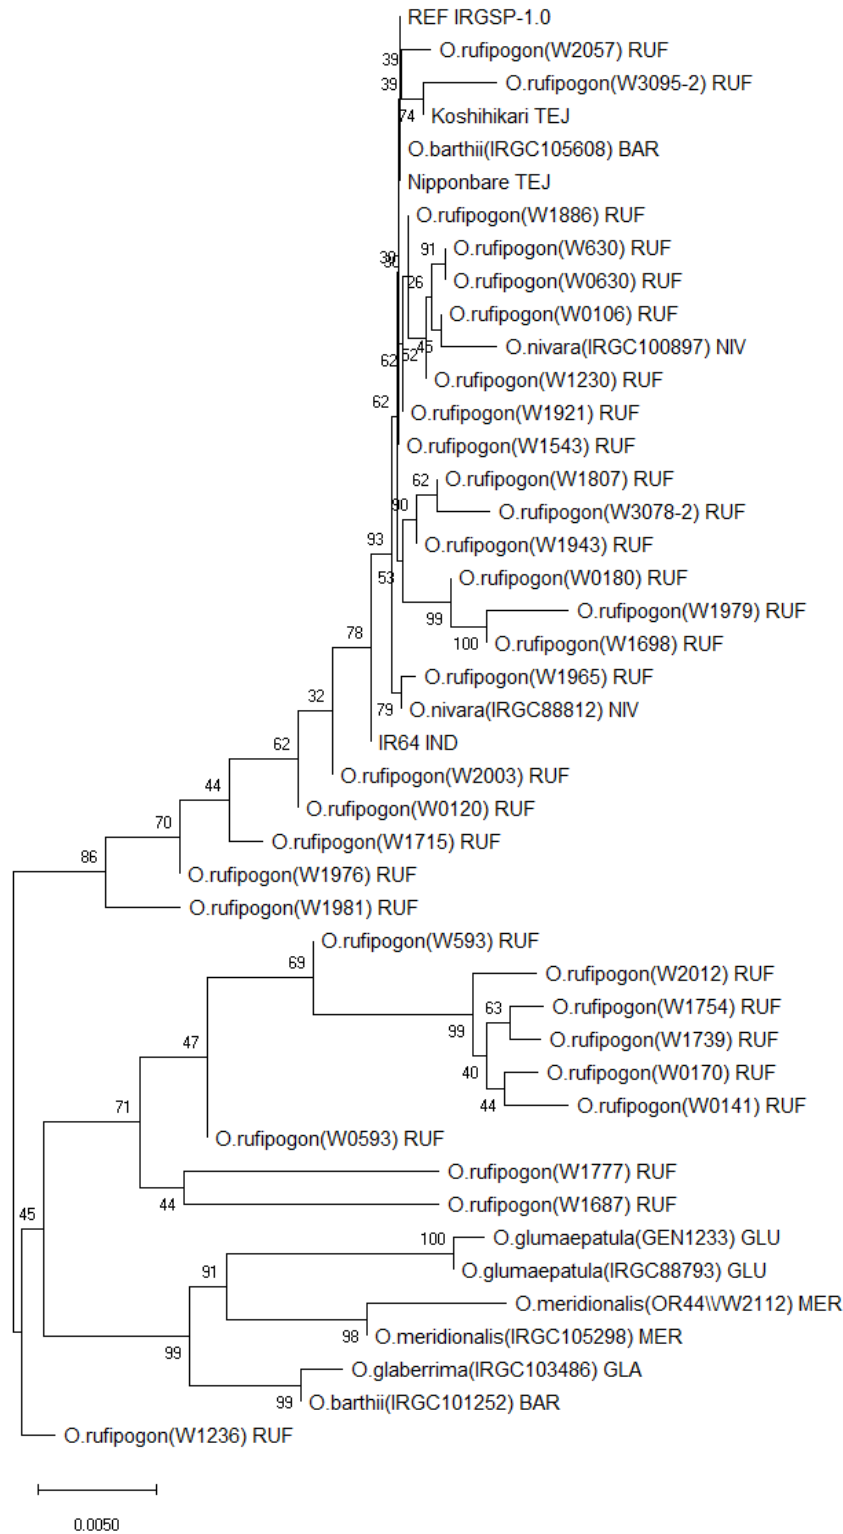

206 **Fig.7.** Schematic representation for enhancing the genetic gain for yield under severe drought  
 207 stress in rice for the development of water saving rice varieties

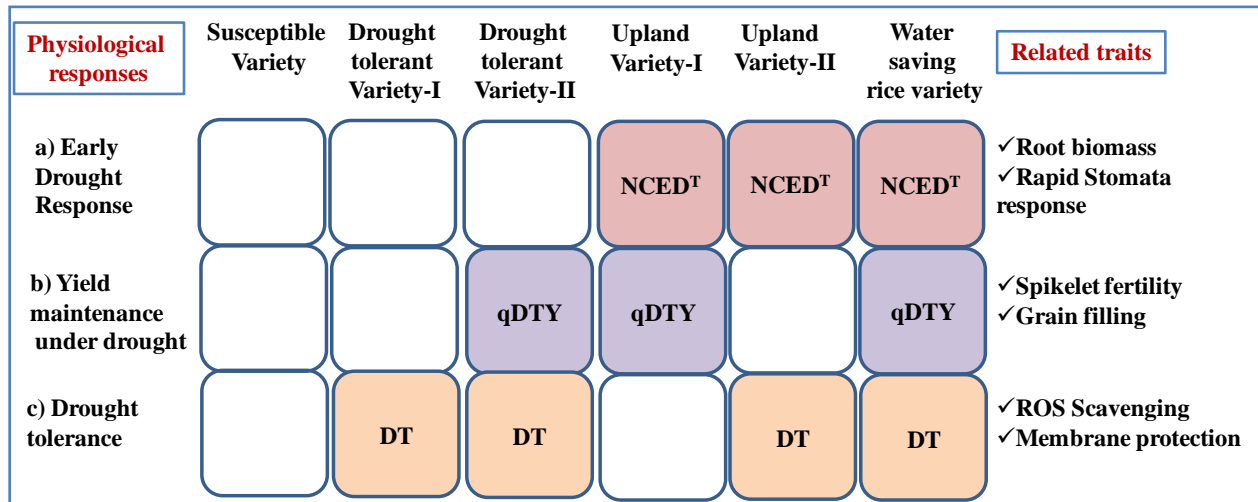

208

209 **Fig.7.** Schematic representation for enhancing genetic gain for yield under severe drought  
 210 stress in rice. Breeding models for the development of water saving rice varieties in the present model  
 211 comprises of combination of early drought response (pink color), yield maintenance (purple  
 212 color) and drought tolerance (brown color) conferred by NCED<sup>T</sup>, qDTY12.1, and drought  
 213 tolerant QTLs. White color indicates absence of above mentioned traits in susceptible varieties.  
 214 Water saving varieties comprises of all three physiological responses under severe drought stress  
 215 conditions. Upland or drought tolerant varieties comprises of any two of above mentioned  
 216 physiological responses. The related traits for these three physiological responses are given in  
 217 right side of the schematic diagram.

218

219

220

221

222

223

224

## 225 Discussion

226 The first findings of this study are qDTY12.1 region (14-18Mbp) in rice has evolved  
227 differently and contributed to both upland adaptation and drought tolerance in rice. The  
228 differential grouping of Vandana (upland cultivar but drought susceptible at reproductive stage)  
229 and N22 (drought tolerant) in phylogeny for different genomic regions within qDTY12.1,  
230 differential fixation of DECUSSATE alleles in rice ecotypes, and diversity of OsDEC gene  
231 sequences in wild rice relatives substantiates the evolutionary significance of genomic blocks  
232 within qDTY12.1. In agreement with our findings, OsNCED2<sup>T</sup> allele was found only in upland  
233 cultivars (Lyu et al, 2013) and enhanced ABA levels and lateral root density contributing to  
234 aerobic adaptation of rice (Hu et al, 2020). Additionally, a comprehensive GWAS analysis using  
235 3.3 million SNPs also identified several significant root length associated SNPs in the entire 12<sup>th</sup>  
236 chromosome specifically in indica than japonica ecotypes (Zhao et al, 2018). In rice, 11<sup>th</sup> and  
237 12<sup>th</sup> chromosome was found to be evolved and associated with richness of disease resistance R  
238 genes (Rice chromosome sequencing consortium, 2005). Similarly, we presume that the 12<sup>th</sup>  
239 chromosome may also be differentially evolved and associated for ecotypes diversification and  
240 drought tolerance in rice. However, rather than gene duplications which are responsible for  
241 multiple homologs of R genes in 11 and 12<sup>th</sup> chromosome, evolutionary mechanisms might be  
242 different in 12<sup>th</sup> chromosome especially within qDTY12.1 genomic regions which are associated  
243 with combinations of drought tolerance, root biomass and aerobic adaptations.

244 The second findings from this study is the possible ‘omnigenic effect’ of OsNCED2<sup>T</sup>  
245 allele with qDTY12.1 in rice. The omnigenic model was initially proposed for disease related  
246 traits in humans wherein strong trait associated loci along with adjoining genes and other genes  
247 spread in the genome are interconnected and regulates the phenotype of complex traits (Boyle et  
248 al, 2017). Recently, de los Reyes (2021) identified DECUSSATE gene in rice as one of the  
249 causal gene in qDTY12.1 which regulates panicle development under drought stress.  
250 Additionally, another causal gene OsNAM<sub>12.1</sub> and several other candidate genes have been  
251 reported for controlling the drought tolerance mechanism in qDTY12.1 (Dixit et al, 2015). All  
252 these reports strengthen the omnigenic effect of genes in qDTY12.1 for conferring yield  
253 advantage under drought stress. Since, both the OsNCED2<sup>T</sup> (Hu et al, 2020) and OsNAM<sub>12.1</sub>  
254 (Dixit et al, 2015) regulates root length and grain yield, Vandana cultivar consist of favorable  
255 allele of NCED2 gene, and it is located within the genomic regions studied for the

256 characterization of qDTY12.1, we propose that OsNCED<sup>T</sup> gene functions as omnigenic gene and  
257 regulates the qDTY12.1 for the maintenance of yield under severe drought stress. The enhanced  
258 ABA levels and signaling due to OsNCED<sup>T</sup> allele might be considered as omnigenic mechanism  
259 for the qDTY12.1 conferring drought tolerance. However, this assumption requires further  
260 studies and characterization.

261 The development of water saving rice varieties has the potential to ensure sustainable rice  
262 production in coming decades (Luo et al, 2010). In this regard, qDTY12.1 which showed  
263 consistent yield performance and contributed to 23% phenotypic variance for yield under severe  
264 drought stress conditions is highly essential for improvement of rice varieties (Mishra et al,  
265 2013). Additionally, membrane stability QTLs has also been identified in rice for drought  
266 tolerance (Tripathy et al, 2000; Shanmugavadivel et al, 2019). Thus, a breeding model through  
267 introgression of NCED2<sup>T</sup>, qDTY12.1, and QTLs/genes conferring membrane stability for  
268 drought stress has been proposed for further enhancement of genetic gain for yield under severe  
269 drought stress in rice (Fig. 7). The proposed model incorporates the physiological processes  
270 namely rapid response, yield maintenance, and membrane stability under severe drought stress  
271 conditions.

272

273

274

275

276

277

278

279

280

281

## 282 References

- 283 1. Alexandrov, N., Tai, S., Wang, W., Mansueto, L., Palis, K., Fuentes, R. R., ... & McNally, K.  
284 L. (2015). SNP-Seek database of SNPs derived from 3000 rice genomes. *Nucleic acids*  
285 *research*, 43(D1), D1023-D1027.
- 286 2. Boyle, E. A., Li, Y. I., & Pritchard, J. K. (2017). An expanded view of complex traits: from  
287 polygenic to omnigenic. *Cell*, 169(7), 1177-1186.
- 288 3. de los Reyes, B. G., Sanchez, J., Kaur, P. P., Pabuayon, I. C. M., Karampudi, N. B. R.,  
289 Kitazumi, A., ... & Kumar, A. (2021). Yield maintenance under drought is orchestrated by  
290 the qDTY12. 1-encoded DECUSSATE gene of rice through a network with other flowering-  
291 associated genes across the genetic background. *bioRxiv*.
- 292 4. Dereeper, A., Guignon, V., Blanc, G., Audic, S., Buffet, S., Chevenet, F., ... & Gascuel, O.  
293 (2008). Phylogeny. fr: robust phylogenetic analysis for the non-specialist. *Nucleic acids*  
294 *research*, 36(suppl\_2), W465-W469.
- 295 5. Dixit, S., Biswal, A. K., Min, A., Henry, A., Oane, R. H., Raorane, M. L., ... & Kohli, A.  
296 (2015). Action of multiple intra-QTL genes concerted around a co-localized transcription  
297 factor underpins a large effect QTL. *Scientific Reports*, 5(1), 1-16.
- 298 6. Dixit, S., Swamy, B. M., Vikram, P., Ahmed, H. U., Cruz, M. S., Amante, M., ... & Kumar,  
299 A. (2012). Fine mapping of QTLs for rice grain yield under drought reveals sub-QTLs  
300 conferring a response to variable drought severities. *Theoretical and Applied*  
301 *Genetics*, 125(1), 155-169.
- 302 7. Hu, F., Huang, L., Bao, Y., Qin, S., Ning, M., Lyu, J., ... & Fu, B. (2020). An ABA Synthesis  
303 Enzyme Allele OsNCED2 Promotes the Aerobic Adaption in Upland Rice. *bioRxiv*.
- 304 8. Kumagai, M., Kim, J., Itoh, R., & Itoh, T. (2013). TASUKE: a web-based visualization  
305 program for large-scale resequencing data. *Bioinformatics*, 29(14),
- 306 9. Kumar, A., Dixit, S., Ram, T., Yadaw, R. B., Mishra, K. K., & Mandal, N. P. (2014).  
307 Breeding high-yielding drought-tolerant rice: genetic variations and conventional and  
308 molecular approaches. *Journal of Experimental Botany*, 65(21), 6265-6278.
- 309 10. Kumar, S., Stecher, G., Li, M., Knyaz, C., & Tamura, K. (2018). MEGA X: molecular  
310 evolutionary genetics analysis across computing platforms. *Molecular biology and*  
311 *evolution*, 35(6), 1547-1549. 1806-1808.
- 312 11. Luo, L. J. (2010). Breeding for water-saving and drought-resistance rice (WDR) in  
313 China. *Journal of experimental botany*, 61(13), 3509-3517.
- 314 12. Lyu, J., Zhang, S., Dong, Y., He, W., Zhang, J., Deng, X., ... & Wang, W. (2013). Analysis  
315 of elite variety tag SNPs reveals an important allele in upland rice. *Nature*  
316 *Communications*, 4(1), 1-9.
- 317 13. Milne, I., Shaw, P., Stephen, G., Bayer, M., Cardle, L., Thomas, W. T., ... & Marshall, D.  
318 (2010). Flapjack—graphical genotype visualization. *Bioinformatics*, 26(24), 3133-3134.
- 319 14. Mishra, K. K., Vikram, P., Yadaw, R. B., Swamy, B. M., Dixit, S., Cruz, M. T. S., ... &  
320 Kumar, A. (2013). qDTY 12.1: a locus with a consistent effect on grain yield under drought  
321 in rice. *BMC genetics*, 14(1), 1-10.
- 322 15. Rice Chromosomes 11 and 12 Sequencing Consortia\* [messing@waksman.rutgers.edu](mailto:messing@waksman.rutgers.edu).  
323 (2005). The sequence of rice chromosomes 11 and 12, rich in disease resistance genes and  
324 recent gene duplications. *BMC biology*, 3, 1-18.
- 325 16. Shanmugavadivel, P. S., Prakash, C., & Mithra, S. A. (2019). Molecular approaches for  
326 dissecting and improving drought and heat tolerance in rice. In *Advances in rice research for*  
327 *abiotic stress tolerance* (pp. 839-867). Woodhead Publishing.

- 328 17. Tripathy, J. N., Zhang, J., Robin, S., Nguyen, T. T., & Nguyen, H. T. (2000). QTLs for cell-  
329 membrane stability mapped in rice (*Oryza sativa* L.) under drought stress. *Theoretical and*  
330 *Applied Genetics*, *100*(8), 1197-1202.
- 331 18. Vallabhaneni, R., Bradbury, L. M., & Wurtzel, E. T. (2010). The carotenoid dioxygenase  
332 gene family in maize, sorghum, and rice. *Archives of Biochemistry and Biophysics*, *504*(1),  
333 104-111.
- 334 19. Xiong, L., & Zhu, J. K. (2003). Regulation of abscisic acid biosynthesis. *Plant*  
335 *physiology*, *133*(1), 29-36.
- 336 20. Zhang, J., Jia, W., Yang, J., & Ismail, A. M. (2006). Role of ABA in integrating plant  
337 responses to drought and salt stresses. *Field Crops Research*, *97*(1), 111-119.
- 338 21. Zhao, Y., Zhang, H., Xu, J., Jiang, C., Yin, Z., Xiong, H., ... & Li, Z. (2018). Loci and  
339 natural alleles underlying robust roots and adaptive domestication of upland ecotype rice in  
340 aerobic conditions. *PLoS genetics*, *14*(8), e1007521.
